# Supplementary material
Source: Springer Nature journal article supplement (https://www.springermedizin.de/resource/supplementary/13098_2014_327_MOESM2_ESM.pdf/9671088)

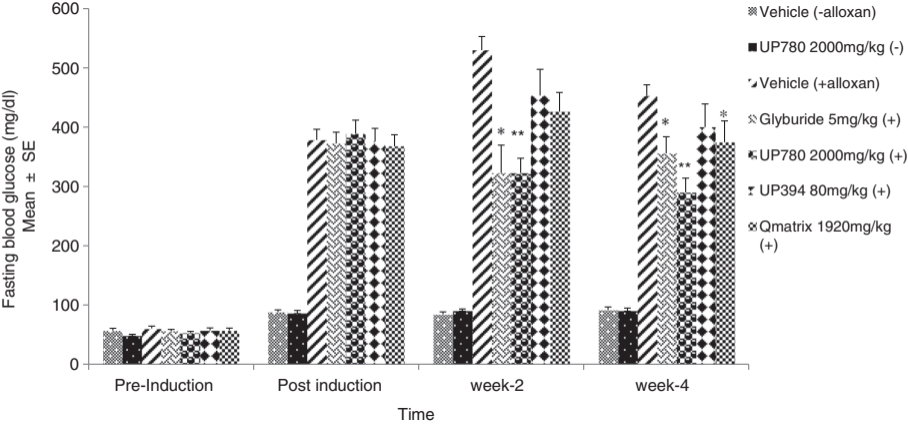

Supplement: MOESM2 [file 9671088]
